# Supplementary material for: Cortical structural differences following repeated ayahuasca use hold molecular signatures
Source: Front Neurosci. 2023 Oct 5;17:1217079. doi: 10.3389/fnins.2023.1217079 (PMC10585114; doi:10.3389/fnins.2023.1217079)
Supplement: Supplementary file 1 [file Table_1.XLSX]

## Sheet: Table S1
Index	Region_name	Hemisphere	Centroid_X	Centroid_Y	Centroid_Z	Yeo_network	vonEconomo_class	FDR_MSN_tscore	FDR_MSN_TIV_tscore	FDR_CT_tscore	PLS1_loading
1	lh_bankssts_part1	LH	-56.404	-40.153	1.7089	Default mode	Associative cortex two (3)	0	0	0	0.0076583
2	lh_bankssts_part2	LH	-53.141	-49.843	8.2646	Default mode	Associative cortex two (3)	-4.13762	-3.96927	0	0.0076583
3	lh_caudalanteriorcingulate_part1	LH	-5.0017	20.646	25.733	Ventral attentional	Limbic (6)	0	0	0	0.11276
4	lh_caudalmiddlefrontal_part1	LH	-33.266	20.2	45.348	Default mode	Associative cortex one (1)	0	0	0	-0.0011705
5	lh_caudalmiddlefrontal_part2	LH	-31.958	2.1466	51.269	Dorsal attentional	Associative cortex one (1)	0	0	0	-0.0038844
6	lh_caudalmiddlefrontal_part3	LH	-38.795	12.585	33.279	Frontoparietal	Associative cortex one (1)	-4.05247	-3.8123	0	-0.0038844
7	lh_caudalmiddlefrontal_part4	LH	-39.715	11.341	48.846	Default mode	Associative cortex one (1)	0	0	0	-0.0011705
8	lh_cuneus_part1	LH	-8.6091	-73.36	17.095	Visual	Secondary sensory cortex (4)	0	0	0	-0.12633
9	lh_cuneus_part2	LH	-5.3042	-87.102	19.323	Visual	Secondary sensory cortex (4)	0	0	0	-0.12633
10	lh_entorhinal_part1	LH	-24.011	-5.8614	-32.827	Limbic	Limbic (6)	3.73011	3.49221	0	0.1877
146	lh_frontalpole_part1	LH	-8.1188	63.549	-9.2185	Limbic	Associative cortex two (3)	0	0	0	0.14689
11	lh_fusiform_part1	LH	-30.238	-46.494	-17.452	Visual	Associative cortex one (1)	0	0	0	0.09282
12	lh_fusiform_part2	LH	-34.772	-9.2996	-35.173	Limbic	Associative cortex one (1)	3.49204	3.24227	0	0.09282
13	lh_fusiform_part3	LH	-33.516	-72.221	-14.258	Visual	Associative cortex one (1)	0	0	0	-0.048145
14	lh_fusiform_part4	LH	-37.632	-38.758	-22.906	Limbic	Associative cortex one (1)	0	0	0	0.073778
15	lh_fusiform_part5	LH	-38.897	-60.875	-16.664	Visual	Associative cortex one (1)	0	0	0	-0.048145
16	lh_inferiorparietal_part1	LH	-43.394	-58.81	40.472	Default mode	Associative cortex two (3)	0	0	0	-0.087073
17	lh_inferiorparietal_part2	LH	-35.981	-83.126	18.926	Visual	Associative cortex two (3)	0	0	0	-0.087073
18	lh_inferiorparietal_part3	LH	-44.904	-56.281	17.44	Default mode	Associative cortex two (3)	0	0	0	0.0076583
19	lh_inferiorparietal_part4	LH	-31.994	-75.484	33.057	Dorsal attentional	Associative cortex two (3)	0	0	0	-0.087073
20	lh_inferiorparietal_part5	LH	-43.132	-66.559	15.906	Dorsal attentional	Associative cortex two (3)	0	0	0	0.0076583
21	lh_inferiorparietal_part6	LH	-37.123	-69.533	43.259	Default mode	Associative cortex two (3)	0	0	0	-0.051331
22	lh_inferiorparietal_part7	LH	-43.266	-75.049	23.401	Default mode	Associative cortex two (3)	0	0	0	-0.051331
23	lh_inferiorparietal_part8	LH	-45.069	-64.283	32.023	Default mode	Associative cortex two (3)	0	0	0	-0.065121
24	lh_inferiortemporal_part1	LH	-43.614	-6.0166	-40.149	Limbic	Associative cortex one (1)	0	0	0	0.037459
25	lh_inferiortemporal_part2	LH	-50.245	-60.609	-7.838	Dorsal attentional	Associative cortex one (1)	0	0	0	0.013641
26	lh_inferiortemporal_part3	LH	-48.243	-19.48	-32.48	Limbic	Associative cortex one (1)	3.18335	2.9262	0	0.073778
27	lh_inferiortemporal_part4	LH	-52.185	-51.758	-16.905	Frontoparietal	Associative cortex one (1)	0	0	0	-0.066567
28	lh_inferiortemporal_part5	LH	-52.818	-31.309	-26.385	Limbic	Associative cortex one (1)	3.36489	3.11338	0	0.043019
29	lh_inferiortemporal_part6	LH	-52.836	-41.77	-22.661	Frontoparietal	Associative cortex one (1)	0	0	0	0.043019
149	lh_insula_part1	LH	-35.687	-20.588	11.657	Somatomotor	Insular (Insular (7))	-2.76783	-2.77205	0	0.23304
150	lh_insula_part2	LH	-34.237	7.1244	-12.184	Ventral attentional	Insular (Insular (7))	3.38593	3.30991	5.88928	0.08763
151	lh_insula_part3	LH	-37.4	-8.5937	4.4364	Ventral attentional	Insular (Insular (7))	0	0	3.65799	0.08763
152	lh_insula_part4	LH	-35.45	4.2798	-0.59237	Ventral attentional	Insular (Insular (7))	0	0	0	-0.0095608
30	lh_isthmuscingulate_part1	LH	-8.6169	-48.172	7.7319	Default mode	Limbic (6)	0	0	3.81984	0.015028
31	lh_isthmuscingulate_part2	LH	-5.075	-42.785	28.464	Default mode	Limbic (6)	0	0	5.02394	0.015028
32	lh_lateraloccipital_part1	LH	-24.909	-92.3	14.186	Visual	Secondary sensory cortex (4)	0	0	0	-0.072467
33	lh_lateraloccipital_part2	LH	-42.947	-72.409	-6.834	Visual	Secondary sensory cortex (4)	0	0	0	0.028938
34	lh_lateraloccipital_part3	LH	-14.745	-99.827	8.8439	Visual	Secondary sensory cortex (4)	0	0	0	-0.072467
35	lh_lateraloccipital_part4	LH	-45.166	-77.34	4.5831	Visual	Secondary sensory cortex (4)	0	0	0	-0.11706
36	lh_lateraloccipital_part5	LH	-16.533	-100.15	-6.0461	Visual	Secondary sensory cortex (4)	0	0	0	-0.15231
37	lh_lateraloccipital_part6	LH	-34.836	-84.61	-14.469	Visual	Secondary sensory cortex (4)	0	0	0	-0.066567
38	lh_lateraloccipital_part7	LH	-28.702	-89.411	2.4352	Visual	Secondary sensory cortex (4)	0	0	0	-0.067422
39	lh_lateraloccipital_part8	LH	-24.468	-93.362	-13.928	Visual	Secondary sensory cortex (4)	0	0	0	-0.092348
40	lh_lateraloccipital_part9	LH	-35.435	-89.191	-3.7326	Visual	Secondary sensory cortex (4)	0	0	0	0.015021
41	lh_lateralorbitofrontal_part1	LH	-17.754	47.756	-18.101	Limbic	Secondary sensory cortex (4)	0	0	0	0.04101
42	lh_lateralorbitofrontal_part2	LH	-20.811	15.328	-20.022	Limbic	Secondary sensory cortex (4)	0	0	0	0.08763
43	lh_lateralorbitofrontal_part3	LH	-28.967	31.229	-15.813	Limbic	Secondary sensory cortex (4)	0	0	0	0.08763
44	lh_lateralorbitofrontal_part4	LH	-28.864	25.384	-12.547	Default mode	Secondary sensory cortex (4)	0	0	0	-0.10495
45	lh_lingual_part1	LH	-23.078	-62.599	-8.5007	Visual	Secondary sensory cortex (4)	0	0	0	-0.10495
46	lh_lingual_part2	LH	-6.5596	-88.407	-8.0452	Visual	Secondary sensory cortex (4)	0	0	0	0.25254
47	lh_lingual_part3	LH	-16.9	-52.515	-6.0028	Visual	Secondary sensory cortex (4)	0	0	0	-0.15231
48	lh_lingual_part4	LH	-6.9801	-76.649	-1.6624	Visual	Secondary sensory cortex (4)	3.45274	3.41647	-2.96664	0.25254
49	lh_lingual_part5	LH	-14.722	-63.34	0.89487	Visual	Secondary sensory cortex (4)	0	0	0	-0.10495
50	lh_lingual_part6	LH	-15.834	-74.541	-9.203	Visual	Secondary sensory cortex (4)	0	0	0	0.23304
51	lh_medialorbitofrontal_part1	LH	-6.0252	17.266	-16.859	Limbic	Secondary sensory cortex (4)	2.92261	2.70403	0	0.046155
52	lh_medialorbitofrontal_part2	LH	-6.5011	52.613	-11.098	Default mode	Secondary sensory cortex (4)	0	0	3.07524	0.041927
53	lh_medialorbitofrontal_part3	LH	-5.7192	39.966	-19.798	Limbic	Secondary sensory cortex (4)	4.66859	4.44536	0	0.0076583
54	lh_middletemporal_part1	LH	-59.379	-14.5	-22.706	Default mode	Associative cortex one (1)	0	0	0	0.013641
55	lh_middletemporal_part2	LH	-56.849	-58.883	2.3819	Dorsal attentional	Associative cortex one (1)	0	0	0	0.013641
56	lh_middletemporal_part3	LH	-52.195	-0.91522	-29.74	Default mode	Associative cortex one (1)	0	0	0	0.0076583
57	lh_middletemporal_part4	LH	-60.826	-42.142	-8.0543	Default mode	Associative cortex one (1)	0	0	0	0.0076583
58	lh_middletemporal_part5	LH	-60.019	-27.635	-13.299	Default mode	Associative cortex one (1)	0	0	0	0.1877
61	lh_paracentral_part1	LH	-7.3628	-38.57	61.859	Somatomotor	Primary motor cortex (1)	0	0	0	0.02651
62	lh_paracentral_part2	LH	-8.7213	-21.255	49.808	Somatomotor	Primary motor cortex (1)	0	0	0	0.02651
63	lh_paracentral_part3	LH	-7.5063	-26.003	60.179	Somatomotor	Primary motor cortex (1)	0	0	0	-0.0038844
59	lh_parahippocampal_part1	LH	-25.991	-25.187	-25.332	Limbic	Limbic (6)	0	0	0	0.1877
60	lh_parahippocampal_part2	LH	-22.076	-38.248	-12.108	Visual	Limbic (6)	0	0	0	-0.072287
64	lh_parsopercularis_part1	LH	-49.74	21.61	15.596	Default mode	Associative cortex one (1)	-2.68397	0	-2.93301	0.047085
65	lh_parsopercularis_part2	LH	-44.486	11.435	5.6531	Ventral attentional	Associative cortex one (1)	-3.55491	-3.31685	0	0.014216
66	lh_parsopercularis_part3	LH	-45.812	13.245	17.796	Frontoparietal	Associative cortex one (1)	-4.08247	-3.95118	0	0.018249
67	lh_parsorbitalis_part1	LH	-41.443	40.408	-12.178	Default mode	Secondary sensory cortex (4)	0	0	0	0.0052649
68	lh_parstriangularis_part1	LH	-48.102	30.819	5.2278	Default mode	Associative cortex one (1)	0	0	0	0.0052649
69	lh_parstriangularis_part2	LH	-40.487	31.111	-0.50213	Default mode	Associative cortex one (1)	0	0	0	-0.15231
70	lh_pericalcarine_part1	LH	-9.9864	-89.403	3.9261	Visual	Primary sensory cortex (5)	0	0	0	-0.15231
71	lh_pericalcarine_part2	LH	-13.644	-74.059	7.274	Visual	Primary sensory cortex (5)	0	0	-3.56061	-0.057802
72	lh_postcentral_part1	LH	-16.09	-36.385	70.946	Somatomotor	Primary sensory cortex (5)	0	0	0	-0.030183
73	lh_postcentral_part2	LH	-51.748	-13.375	13.364	Somatomotor	Primary sensory cortex (5)	-3.71938	-3.48726	0	-0.057802
74	lh_postcentral_part3	LH	-29.604	-33.27	62.904	Somatomotor	Primary sensory cortex (5)	0	0	0	-0.029219
75	lh_postcentral_part4	LH	-60.994	-13.469	23.995	Somatomotor	Primary sensory cortex (5)	0	0	0	-0.030183
76	lh_postcentral_part5	LH	-40.489	-29.291	58.127	Somatomotor	Primary sensory cortex (5)	0	0	0	0.0023839
77	lh_postcentral_part6	LH	-53.221	-15.221	34.495	Somatomotor	Primary sensory cortex (5)	0	0	0	-0.058187
78	lh_postcentral_part7	LH	-44.948	-27.508	49.682	Somatomotor	Primary sensory cortex (5)	-2.77683	0	0	-0.045569
79	lh_postcentral_part8	LH	-49.124	-21.492	44.209	Somatomotor	Primary sensory cortex (5)	0	0	0	-0.00143
80	lh_posteriorcingulate_part1	LH	-6.4485	-26.227	38.546	Ventral attentional	Limbic (6)	-3.32873	-3.15356	0	0.11276
81	lh_posteriorcingulate_part2	LH	-4.3811	-7.3467	35.44	Ventral attentional	Limbic (6)	4.0213	3.97746	2.90652	0.0023839
82	lh_precentral_part1	LH	-37.874	-17.551	53.144	Somatomotor	Primary motor cortex (1)	0	0	0	0.047085
83	lh_precentral_part2	LH	-49.771	0.85905	7.7181	Ventral attentional	Primary motor cortex (1)	-4.59549	-4.5687	0	0.0023839
84	lh_precentral_part3	LH	-13.373	-26.42	69.113	Somatomotor	Primary motor cortex (1)	0	0	0	0.014216
85	lh_precentral_part4	LH	-54.642	3.8046	21.877	Ventral attentional	Primary motor cortex (1)	-3.13684	-2.96229	0	0.018899
86	lh_precentral_part5	LH	-24.046	-17.931	65.358	Somatomotor	Primary motor cortex (1)	0	0	0	0.0023839
87	lh_precentral_part6	LH	-32.737	-15.538	59.027	Somatomotor	Primary motor cortex (1)	0	0	0	-0.045569
88	lh_precentral_part7	LH	-53.932	-2.5691	28.428	Somatomotor	Primary motor cortex (1)	-4.24384	-4.08379	0	0.014216
89	lh_precentral_part8	LH	-42.152	-6.4378	47.717	Dorsal attentional	Primary motor cortex (1)	0	0	0	0.0112
90	lh_precentral_part9	LH	-47.849	-7.087	39.929	Somatomotor	Primary motor cortex (1)	0	0	0	-0.12633
91	lh_precuneus_part1	LH	-14.24	-60.531	12.162	Default mode	Associative cortex one (1)	-2.87045	-2.70009	0	-0.072287
92	lh_precuneus_part2	LH	-9.7131	-48.762	58.943	Ventral attentional	Associative cortex one (1)	0	0	0	-0.068139
93	lh_precuneus_part3	LH	-11.606	-66.186	23.613	Default mode	Associative cortex one (1)	-2.92859	-2.96435	0	-0.068139
94	lh_precuneus_part4	LH	-9.2608	-44.096	43.358	Default mode	Associative cortex one (1)	0	0	0	-0.068139
95	lh_precuneus_part5	LH	-7.174	-69.685	35.982	Default mode	Associative cortex one (1)	-3.29849	-3.28496	0	-0.072287
96	lh_precuneus_part6	LH	-7.305	-61.735	48.466	Default mode	Associative cortex one (1)	0	0	0	0.020656
97	lh_precuneus_part7	LH	-7.4116	-56.623	28.838	Default mode	Associative cortex one (1)	0	0	0	0.19978
98	lh_rostralanteriorcingulate_part1	LH	-5.0207	35.551	2.4731	Default mode	Limbic (6)	0	0	0	-0.0038844
99	lh_rostralmiddlefrontal_part1	LH	-40.06	33.65	16.157	Frontoparietal	Associative cortex two (3)	0	0	0	-0.0038844
108	lh_rostralmiddlefrontal_part10	LH	-26.224	50.223	20.187	Frontoparietal	Associative cortex two (3)	0	0	0	0.044491
100	lh_rostralmiddlefrontal_part2	LH	-39.194	47.543	5.0713	Frontoparietal	Associative cortex two (3)	0	0	0	-0.0011705
101	lh_rostralmiddlefrontal_part3	LH	-31.628	29.74	36.488	Ventral attentional	Associative cortex two (3)	0	0	0	-0.0011705
102	lh_rostralmiddlefrontal_part4	LH	-21.916	57.99	-10.367	Limbic	Associative cortex two (3)	0	0	0	-0.0038844
103	lh_rostralmiddlefrontal_part5	LH	-42.454	27.74	29.636	Frontoparietal	Associative cortex two (3)	0	0	0	-0.0011705
104	lh_rostralmiddlefrontal_part6	LH	-32.064	53.734	-2.7663	Frontoparietal	Associative cortex two (3)	0	0	3.04567	0.0068615
105	lh_rostralmiddlefrontal_part7	LH	-25.072	40.946	29.7	Ventral attentional	Associative cortex two (3)	0	0	4.01061	-0.0011705
106	lh_rostralmiddlefrontal_part8	LH	-23.693	56.431	9.9102	Default mode	Associative cortex two (3)	0	0	3.02343	-0.0038844
107	lh_rostralmiddlefrontal_part9	LH	-37.375	41.639	23.134	Frontoparietal	Associative cortex two (3)	0	0	0	-0.0011705
109	lh_superiorfrontal_part1	LH	-11.063	61.803	6.2995	Default mode	Associative cortex one (1)	0	0	0	0.016264
118	lh_superiorfrontal_part10	LH	-8.0508	16.079	48.006	Ventral attentional	Associative cortex one (1)	-4.04912	-3.80914	0	-0.0011705
119	lh_superiorfrontal_part11	LH	-17.722	30.842	48.029	Default mode	Associative cortex one (1)	0	0	0	0.0068615
120	lh_superiorfrontal_part12	LH	-17.762	21.068	55.61	Default mode	Associative cortex one (1)	0	0	0	0.044491
121	lh_superiorfrontal_part13	LH	-6.9395	28.798	44.5	Frontoparietal	Associative cortex one (1)	0	0	0	-0.057802
110	lh_superiorfrontal_part2	LH	-11.687	-8.4248	64.785	Somatomotor	Associative cortex one (1)	0	0	0	0.19978
111	lh_superiorfrontal_part3	LH	-9.0207	52.775	15.417	Default mode	Associative cortex one (1)	0	0	5.83634	0.0068615
112	lh_superiorfrontal_part4	LH	-17.927	1.24	62.199	Dorsal attentional	Associative cortex one (1)	0	0	0	0.044491
113	lh_superiorfrontal_part5	LH	-10.35	54.691	27.231	Default mode	Associative cortex one (1)	0	0	5.2548	0.044491
114	lh_superiorfrontal_part6	LH	-7.2065	-2.8305	52.237	Somatomotor	Associative cortex one (1)	-2.76706	0	0	0.11276
115	lh_superiorfrontal_part7	LH	-7.8667	41.423	31.085	Default mode	Associative cortex one (1)	-3.24111	-2.98338	3.51505	0.044491
116	lh_superiorfrontal_part8	LH	-10.007	10.758	61.434	Default mode	Associative cortex one (1)	0	0	0	0.044491
117	lh_superiorfrontal_part9	LH	-12.799	41.987	41.756	Default mode	Associative cortex one (1)	0	0	4.03248	0.11276
122	lh_superiorparietal_part1	LH	-16.829	-49.728	66.32	Somatomotor	Associative cortex one (1)	0	0	0	-0.072467
131	lh_superiorparietal_part10	LH	-12.296	-70.56	52.287	Dorsal attentional	Associative cortex one (1)	-2.73566	0	0	-0.016398
123	lh_superiorparietal_part2	LH	-12.001	-89.21	25.054	Visual	Associative cortex one (1)	0	0	0	-0.082783
124	lh_superiorparietal_part3	LH	-31.851	-47.447	59.382	Somatomotor	Associative cortex one (1)	0	0	0	-0.082783
125	lh_superiorparietal_part4	LH	-34.424	-45.067	46.744	Dorsal attentional	Associative cortex one (1)	-4.63801	-4.52617	0	-0.087073
126	lh_superiorparietal_part5	LH	-29.741	-54.798	46.406	Dorsal attentional	Associative cortex one (1)	0	0	0	-0.072467
127	lh_superiorparietal_part6	LH	-18.845	-83.869	31.85	Visual	Associative cortex one (1)	0	0	0	-0.057802
128	lh_superiorparietal_part7	LH	-20.724	-60.529	61.521	Dorsal attentional	Associative cortex one (1)	0	0	0	-0.082783
129	lh_superiorparietal_part8	LH	-23.65	-73.056	29.861	Dorsal attentional	Associative cortex one (1)	0	-2.87036	0	-0.087073
130	lh_superiorparietal_part9	LH	-21.033	-66.469	43.566	Dorsal attentional	Associative cortex one (1)	0	0	0	-0.082783
132	lh_superiortemporal_part1	LH	-49.5	-32.087	8.0409	Somatomotor	Associative cortex two (3)	-3.6779	-3.43162	0	-0.0095608
133	lh_superiortemporal_part2	LH	-43.696	8.4431	-23.51	Default mode	Associative cortex two (3)	0	0	0	-0.016398
134	lh_superiortemporal_part3	LH	-61.949	-38.301	11.641	Somatomotor	Associative cortex two (3)	0	0	0	-0.0095608
135	lh_superiortemporal_part4	LH	-52.287	3.186	-16.006	Default mode	Associative cortex two (3)	-3.359	-3.12324	0	-0.029219
136	lh_superiortemporal_part5	LH	-59.114	-24.142	-1.9033	Default mode	Associative cortex two (3)	-2.94095	-2.88066	0	-0.043356
137	lh_superiortemporal_part6	LH	-55.627	-12.855	-2.4308	Somatomotor	Associative cortex two (3)	0	0	0	0.052992
138	lh_superiortemporal_part7	LH	-51.983	-7.2074	-8.806	Default mode	Associative cortex two (3)	-4.10385	-3.87436	0	-0.087073
139	lh_supramarginal_part1	LH	-44.148	-47.573	41.342	Frontoparietal	Associative cortex two (3)	0	0	0	0.081409
140	lh_supramarginal_part2	LH	-46.733	-28.505	18.622	Somatomotor	Associative cortex two (3)	0	0	0	-0.065121
141	lh_supramarginal_part3	LH	-54.164	-47.447	39.001	Frontoparietal	Associative cortex two (3)	0	0	0	-0.033118
142	lh_supramarginal_part4	LH	-58.912	-29.413	25.094	Ventral attentional	Associative cortex two (3)	-3.13885	-2.91313	0	-0.051331
143	lh_supramarginal_part5	LH	-57.393	-49.402	24.447	Ventral attentional	Associative cortex two (3)	-3.63598	-3.3893	0	-0.065121
144	lh_supramarginal_part6	LH	-54.589	-32.859	37.252	Dorsal attentional	Associative cortex two (3)	-3.13054	-2.97677	0	-0.065121
145	lh_supramarginal_part7	LH	-49.357	-38.912	32.554	Ventral attentional	Associative cortex two (3)	-2.83723	-2.78536	0	0.072034
147	lh_temporalpole_part1	LH	-31.542	10.662	-35.594	Limbic	Associative cortex one (1)	4.54458	4.30924	0	-0.043356
148	lh_transversetemporal_part1	LH	-44.534	-22.9	6.7732	Somatomotor	Primary sensory cortex (5)	-2.80535	0	-2.95908	0.081409
153	rh_bankssts_part1	RH	53.969	-39.123	1.4973	Default mode	Associative cortex two (3)	0	0	0
154	rh_bankssts_part2	RH	54.99	-42.904	8.9516	Ventral attentional	Associative cortex two (3)	0	0	0
155	rh_caudalanteriorcingulate_part1	RH	5.6393	21.084	26.726	Ventral attentional	Limbic (6)	0	0	0
156	rh_caudalmiddlefrontal_part1	RH	37.199	10.574	33.786	Frontoparietal	Associative cortex one (1)	0	0	0
157	rh_caudalmiddlefrontal_part2	RH	32.88	5.008	52.605	Frontoparietal	Associative cortex one (1)	0	0	0
158	rh_caudalmiddlefrontal_part3	RH	38.176	21.138	45.693	Frontoparietal	Associative cortex one (1)	0	0	0
159	rh_caudalmiddlefrontal_part4	RH	36.442	12.222	48.854	Frontoparietal	Associative cortex one (1)	0	0	0
160	rh_cuneus_part1	RH	7.9701	-78.014	26.548	Visual	Secondary sensory cortex (4)	0	0	0
161	rh_cuneus_part2	RH	6.2011	-89.291	13.002	Visual	Secondary sensory cortex (4)	0	0	0
162	rh_cuneus_part3	RH	8.6302	-72.195	16.803	Visual	Secondary sensory cortex (4)	0	0	-4.4445
163	rh_entorhinal_part1	RH	24.688	-4.9622	-33.415	Limbic	Limbic (6)	5.21605	4.97897	0
302	rh_frontalpole_part1	RH	9.8338	62.819	-10.737	Limbic	Associative cortex two (3)	0	0	0
164	rh_fusiform_part1	RH	32.029	-69.723	-12.972	Visual	Associative cortex one (1)	0	0	0
165	rh_fusiform_part2	RH	34.95	-7.7812	-36.41	Limbic	Associative cortex one (1)	3.41105	3.1585	0
166	rh_fusiform_part3	RH	37.491	-59.459	-16.182	Visual	Associative cortex one (1)	0	0	0
167	rh_fusiform_part4	RH	36.035	-34.845	-22.614	Visual	Associative cortex one (1)	0	0	0
168	rh_fusiform_part5	RH	33.584	-48.043	-16.66	Visual	Associative cortex one (1)	0	0	0
169	rh_inferiorparietal_part1	RH	49.547	-52.679	13.404	Dorsal attentional	Associative cortex two (3)	0	0	0
178	rh_inferiorparietal_part10	RH	46.551	-64.835	30.294	Default mode	Associative cortex two (3)	0	0	0
170	rh_inferiorparietal_part2	RH	37.366	-80.32	21.612	Visual	Associative cortex two (3)	-3.21715	-3.08815	0
171	rh_inferiorparietal_part3	RH	51.26	-52.231	26.509	Default mode	Associative cortex two (3)	0	0	0
172	rh_inferiorparietal_part4	RH	35.462	-73.578	35.112	Dorsal attentional	Associative cortex two (3)	0	0	0
173	rh_inferiorparietal_part5	RH	43.067	-65.541	12.949	Visual	Associative cortex two (3)	0	0	0
174	rh_inferiorparietal_part6	RH	42.331	-50.822	40.643	Frontoparietal	Associative cortex two (3)	0	0	0
175	rh_inferiorparietal_part7	RH	42.866	-72.44	20.835	Dorsal attentional	Associative cortex two (3)	0	0	0
176	rh_inferiorparietal_part8	RH	50.2	-56.465	40.015	Default mode	Associative cortex two (3)	0	0	0
177	rh_inferiorparietal_part9	RH	38.151	-64.761	44.784	Frontoparietal	Associative cortex two (3)	0	0	0
179	rh_inferiortemporal_part1	RH	43.38	-4.2933	-40.017	Limbic	Associative cortex one (1)	0	0	0
180	rh_inferiortemporal_part2	RH	51.657	-58.795	-8.9104	Dorsal attentional	Associative cortex one (1)	0	0	0
181	rh_inferiortemporal_part3	RH	52.72	-19.405	-32.36	Limbic	Associative cortex one (1)	3.19046	2.96525	0
182	rh_inferiortemporal_part4	RH	53.741	-48.776	-18.39	Dorsal attentional	Associative cortex one (1)	0	0	0
183	rh_inferiortemporal_part5	RH	51.821	-32.636	-24.873	Limbic	Associative cortex one (1)	3.7389	3.5241	0
305	rh_insula_part1	RH	36.196	9.1734	-11.674	Ventral attentional	Insular (Insular (7))	4.34597	4.37861	4.27318
306	rh_insula_part2	RH	36.409	-19.093	10.738	Somatomotor	Insular (Insular (7))	0	0	0
307	rh_insula_part3	RH	38.165	-6.0456	4.2853	Ventral attentional	Insular (Insular (7))	3.657	3.50598	0
308	rh_insula_part4	RH	36.767	5.5735	-1.3633	Ventral attentional	Insular (Insular (7))	4.10701	4.31271	3.56633
184	rh_isthmuscingulate_part1	RH	10.076	-47.139	6.8641	Visual	Limbic (6)	0	0	0
185	rh_isthmuscingulate_part2	RH	5.0817	-43.031	27.895	Default mode	Limbic (6)	0	0	4.54773
186	rh_lateraloccipital_part1	RH	18.646	-99.162	-7.394	Visual	Secondary sensory cortex (4)	0	0	0
187	rh_lateraloccipital_part2	RH	44.513	-70.022	-2.0359	Visual	Secondary sensory cortex (4)	0	0	0
188	rh_lateraloccipital_part3	RH	17.106	-99.073	10.07	Visual	Secondary sensory cortex (4)	0	0	0
189	rh_lateraloccipital_part4	RH	24.049	-90.627	16.783	Visual	Secondary sensory cortex (4)	-4.46325	-4.28268	-3.46643
190	rh_lateraloccipital_part5	RH	43.316	-78.805	-11.404	Visual	Secondary sensory cortex (4)	0	0	0
191	rh_lateraloccipital_part6	RH	32.221	-84.386	8.2592	Visual	Secondary sensory cortex (4)	0	0	0
192	rh_lateraloccipital_part7	RH	28.676	-86.708	-12.2	Visual	Secondary sensory cortex (4)	0	0	0
193	rh_lateraloccipital_part8	RH	29.431	-94.003	-5.3629	Visual	Secondary sensory cortex (4)	0	0	0
194	rh_lateraloccipital_part9	RH	41.603	-84.248	-1.2377	Visual	Secondary sensory cortex (4)	0	0	0
195	rh_lateralorbitofrontal_part1	RH	22.097	15.253	-19.587	Limbic	Secondary sensory cortex (4)	5.26906	5.03487	0
196	rh_lateralorbitofrontal_part2	RH	18.684	45.826	-18.557	Limbic	Secondary sensory cortex (4)	0	0	0
197	rh_lateralorbitofrontal_part3	RH	34.727	27.001	-12.522	Default mode	Secondary sensory cortex (4)	0	0	0
198	rh_lateralorbitofrontal_part4	RH	19.725	30.733	-19.56	Limbic	Secondary sensory cortex (4)	6.3241	6.16845	0
199	rh_lingual_part1	RH	18.333	-50.895	-4.9115	Visual	Secondary sensory cortex (4)	0	0	0
200	rh_lingual_part2	RH	8.1982	-89.141	-8.5737	Visual	Secondary sensory cortex (4)	2.78951	0	0
201	rh_lingual_part3	RH	20.626	-58.532	-6.0805	Visual	Secondary sensory cortex (4)	0	0	0
202	rh_lingual_part4	RH	7.6879	-77.239	-3.4715	Visual	Secondary sensory cortex (4)	4.56665	4.36664	0
203	rh_lingual_part5	RH	12.885	-63.722	2.1839	Visual	Secondary sensory cortex (4)	0	0	0
204	rh_lingual_part6	RH	17.115	-73.041	-8.472	Visual	Secondary sensory cortex (4)	0	0	-3.59233
205	rh_medialorbitofrontal_part1	RH	7.618	52.546	-8.6713	Default mode	Secondary sensory cortex (4)	2.9771	2.77044	0
206	rh_medialorbitofrontal_part2	RH	6.6366	19.291	-18.221	Limbic	Secondary sensory cortex (4)	5.38111	5.17643	0
207	rh_medialorbitofrontal_part3	RH	6.3354	40.742	-18.018	Limbic	Secondary sensory cortex (4)	4.45745	4.22087	0
208	rh_middletemporal_part1	RH	60.749	-34.048	-8.0652	Frontoparietal	Associative cortex one (1)	0	0	0
209	rh_middletemporal_part2	RH	51.631	2.9988	-32.906	Default mode	Associative cortex one (1)	4.24757	4.03479	0
210	rh_middletemporal_part3	RH	59.994	-10.801	-22.33	Default mode	Associative cortex one (1)	4.61138	4.37586	0
211	rh_middletemporal_part4	RH	56.269	-57.782	3.1347	Dorsal attentional	Associative cortex one (1)	0	0	0
212	rh_middletemporal_part5	RH	62.075	-43.289	-7.7187	Frontoparietal	Associative cortex one (1)	0	0	0
213	rh_middletemporal_part6	RH	59.992	-21.625	-15.327	Default mode	Associative cortex one (1)	0	0	0
216	rh_paracentral_part1	RH	11.545	-33.684	49.448	Ventral attentional	Primary motor cortex (1)	0	0	0
217	rh_paracentral_part2	RH	5.3566	-16.772	61.135	Somatomotor	Primary motor cortex (1)	2.88173	3.46668	0
218	rh_paracentral_part3	RH	6.4975	-29.478	59.215	Somatomotor	Primary motor cortex (1)	0	0	0
214	rh_parahippocampal_part1	RH	23.854	-37.517	-11.569	Visual	Limbic (6)	0	0	0
215	rh_parahippocampal_part2	RH	27.448	-24.861	-24.205	Limbic	Limbic (6)	0	0	0
219	rh_parsopercularis_part1	RH	45.542	12.249	5.7792	Ventral attentional	Associative cortex one (1)	0	0	0
220	rh_parsopercularis_part2	RH	50.73	20.262	18.122	Frontoparietal	Associative cortex one (1)	0	0	0
221	rh_parsopercularis_part3	RH	46.693	12.043	16.936	Frontoparietal	Associative cortex one (1)	0	0	0
222	rh_parsorbitalis_part1	RH	42.385	41.078	-11.352	Default mode	Secondary sensory cortex (4)	0	0	0
223	rh_parstriangularis_part1	RH	48.345	35.372	-0.69459	Default mode	Associative cortex one (1)	0	0	0
224	rh_parstriangularis_part2	RH	43.059	25.395	5.9387	Ventral attentional	Associative cortex one (1)	0	0	0
225	rh_parstriangularis_part3	RH	49.411	29.426	7.5604	Frontoparietal	Associative cortex one (1)	0	0	0
226	rh_pericalcarine_part1	RH	14.566	-70.588	8.201	Visual	Primary sensory cortex (5)	0	0	-4.16106
227	rh_pericalcarine_part2	RH	12.275	-91.433	3.4737	Visual	Primary sensory cortex (5)	0	0	0
228	rh_pericalcarine_part3	RH	9.3241	-78.765	7.6759	Visual	Primary sensory cortex (5)	0	0	-3.7922
229	rh_postcentral_part1	RH	13.789	-34.572	71.667	Somatomotor	Primary sensory cortex (5)	0	0	-3.54613
230	rh_postcentral_part2	RH	50.836	-10.314	13.851	Somatomotor	Primary sensory cortex (5)	0	0	0
231	rh_postcentral_part3	RH	28.371	-33.301	63.25	Somatomotor	Primary sensory cortex (5)	0	0	-3.09805
232	rh_postcentral_part4	RH	61.878	-11.132	22.532	Somatomotor	Primary sensory cortex (5)	0	0	0
233	rh_postcentral_part5	RH	39.056	-32.346	56.623	Somatomotor	Primary sensory cortex (5)	-3.44186	-3.19495	0
234	rh_postcentral_part6	RH	54.62	-14.836	36.203	Somatomotor	Primary sensory cortex (5)	0	0	0
235	rh_postcentral_part7	RH	43.566	-23.449	53.868	Somatomotor	Primary sensory cortex (5)	0	0	-3.8884
236	rh_postcentral_part8	RH	48.387	-19.412	45.558	Somatomotor	Primary sensory cortex (5)	0	0	-3.40974
237	rh_posteriorcingulate_part1	RH	5.614	-10.595	38.678	Ventral attentional	Limbic (6)	0	0	0
238	rh_posteriorcingulate_part2	RH	5.7074	-24.731	36.269	Frontoparietal	Limbic (6)	0	0	0
239	rh_precentral_part1	RH	50.415	1.973	7.995	Ventral attentional	Primary motor cortex (1)	0	0	0
240	rh_precentral_part2	RH	13.825	-24.345	68.443	Somatomotor	Primary motor cortex (1)	0	0	0
241	rh_precentral_part3	RH	54.264	5.645	24.205	Dorsal attentional	Primary motor cortex (1)	0	0	0
242	rh_precentral_part4	RH	22.698	-15.158	65.774	Somatomotor	Primary motor cortex (1)	0	0	0
243	rh_precentral_part5	RH	55.756	-2.122	27.642	Somatomotor	Primary motor cortex (1)	0	0	0
244	rh_precentral_part6	RH	33.546	-20.56	58.861	Somatomotor	Primary motor cortex (1)	0	0	0
245	rh_precentral_part7	RH	48.733	-3.4931	43.394	Somatomotor	Primary motor cortex (1)	0	0	0
246	rh_precentral_part8	RH	39.911	-11.508	46.214	Somatomotor	Primary motor cortex (1)	0	0	0
247	rh_precentral_part9	RH	33.181	-9.7618	53.351	Dorsal attentional	Primary motor cortex (1)	0	0	0
248	rh_precuneus_part1	RH	14.099	-58.054	12.917	Visual	Associative cortex one (1)	-4.74859	-4.70953	0
249	rh_precuneus_part2	RH	7.8795	-58.919	24.868	Default mode	Associative cortex one (1)	0	0	0
250	rh_precuneus_part3	RH	9.7611	-47.659	59.439	Dorsal attentional	Associative cortex one (1)	-3.07061	-3.09006	-3.09159
251	rh_precuneus_part4	RH	17.347	-68.079	26.266	Visual	Associative cortex one (1)	-3.96975	-3.88171	-3.11932
252	rh_precuneus_part5	RH	6.4233	-59.7	49.989	Dorsal attentional	Associative cortex one (1)	0	0	0
253	rh_precuneus_part6	RH	7.5625	-66.638	37.238	Default mode	Associative cortex one (1)	0	0	0
254	rh_precuneus_part7	RH	9.1532	-45.783	40.913	Default mode	Associative cortex one (1)	-2.93832	-2.83667	0
255	rh_rostralanteriorcingulate_part1	RH	5.9839	34.533	2.5428	Default mode	Limbic (6)	4.24147	4.00432	0
256	rh_rostralmiddlefrontal_part1	RH	28.995	56.136	-10.25	Frontoparietal	Associative cortex two (3)	-2.6784	0	0
265	rh_rostralmiddlefrontal_part10	RH	30.409	40.025	24.249	Ventral attentional	Associative cortex two (3)	0	0	0
257	rh_rostralmiddlefrontal_part2	RH	22.806	58.195	-1.6275	Frontoparietal	Associative cortex two (3)	0	0	0
258	rh_rostralmiddlefrontal_part3	RH	31.818	29.862	37.897	Frontoparietal	Associative cortex two (3)	0	0	3.17923
259	rh_rostralmiddlefrontal_part4	RH	38.776	49.49	5.1107	Frontoparietal	Associative cortex two (3)	0	0	0
260	rh_rostralmiddlefrontal_part5	RH	43.918	26.858	30.252	Frontoparietal	Associative cortex two (3)	0	0	0
261	rh_rostralmiddlefrontal_part6	RH	23.69	56.926	12.713	Frontoparietal	Associative cortex two (3)	0	0	0
262	rh_rostralmiddlefrontal_part7	RH	43.268	33.058	22.368	Frontoparietal	Associative cortex two (3)	0	0	0
263	rh_rostralmiddlefrontal_part8	RH	24.459	47.984	26.632	Ventral attentional	Associative cortex two (3)	0	0	0
264	rh_rostralmiddlefrontal_part9	RH	38.413	43.921	19.272	Frontoparietal	Associative cortex two (3)	0	0	0
266	rh_superiorfrontal_part1	RH	9.7296	6.9514	45.688	Ventral attentional	Associative cortex one (1)	-2.7667	0	0
275	rh_superiorfrontal_part10	RH	9.105	36.257	30.568	Default mode	Associative cortex one (1)	0	0	3.46442
276	rh_superiorfrontal_part11	RH	9.2005	24.389	53.686	Default mode	Associative cortex one (1)	0	0	0
277	rh_superiorfrontal_part12	RH	16.003	36.525	45.571	Default mode	Associative cortex one (1)	0	0	0
278	rh_superiorfrontal_part13	RH	9.6622	30.315	45.207	Frontoparietal	Associative cortex one (1)	0	0	3.73473
267	rh_superiorfrontal_part2	RH	10.932	61.391	5.9319	Default mode	Associative cortex one (1)	0	0	0
268	rh_superiorfrontal_part3	RH	12.367	-3.2651	65.643	Ventral attentional	Associative cortex one (1)	0	0	0
269	rh_superiorfrontal_part4	RH	10.09	52.879	14.414	Default mode	Associative cortex one (1)	0	0	0
270	rh_superiorfrontal_part5	RH	19.313	3.4106	60.36	Dorsal attentional	Associative cortex one (1)	0	0	0
271	rh_superiorfrontal_part6	RH	10.21	54.909	26.16	Default mode	Associative cortex one (1)	0	0	0
272	rh_superiorfrontal_part7	RH	9.6868	8.2947	60.026	Ventral attentional	Associative cortex one (1)	0	0	0
273	rh_superiorfrontal_part8	RH	11.492	46.988	37.341	Default mode	Associative cortex one (1)	0	0	3.8047
274	rh_superiorfrontal_part9	RH	19.626	17.776	54.751	Frontoparietal	Associative cortex one (1)	0	0	0
279	rh_superiorparietal_part1	RH	23.585	-81.496	24.361	Visual	Associative cortex one (1)	-3.93749	-3.89834	0
288	rh_superiorparietal_part10	RH	30.873	-53.879	51.444	Dorsal attentional	Associative cortex one (1)	0	0	0
280	rh_superiorparietal_part2	RH	14.989	-47.233	68.313	Dorsal attentional	Associative cortex one (1)	0	0	0
281	rh_superiorparietal_part3	RH	15.733	-85.226	34.588	Visual	Associative cortex one (1)	-4.34331	-4.32881	0
282	rh_superiorparietal_part4	RH	22.034	-75.394	40.054	Visual	Associative cortex one (1)	0	0	0
283	rh_superiorparietal_part5	RH	23.849	-65.157	38.592	Dorsal attentional	Associative cortex one (1)	0	0	0
284	rh_superiorparietal_part6	RH	29.591	-46.772	61.291	Dorsal attentional	Associative cortex one (1)	0	0	0
285	rh_superiorparietal_part7	RH	13.059	-68.865	53.703	Dorsal attentional	Associative cortex one (1)	0	0	0
286	rh_superiorparietal_part8	RH	33.209	-44.12	46.361	Dorsal attentional	Associative cortex one (1)	0	0	0
287	rh_superiorparietal_part9	RH	18.52	-59.154	61.759	Dorsal attentional	Associative cortex one (1)	0	0	0
289	rh_superiortemporal_part1	RH	45.127	10.19	-23.683	Default mode	Associative cortex two (3)	3.01837	2.97915	0
290	rh_superiortemporal_part2	RH	60.395	-31.75	9.3726	Somatomotor	Associative cortex two (3)	-4.86795	-4.70956	0
291	rh_superiortemporal_part3	RH	53.18	1.8829	-14.545	Default mode	Associative cortex two (3)	0	0	0
292	rh_superiortemporal_part4	RH	56.76	-7.7168	-6.3082	Default mode	Associative cortex two (3)	0	0	0
293	rh_superiortemporal_part5	RH	59.155	-22.562	3.0087	Somatomotor	Associative cortex two (3)	-3.38287	-3.1318	0
294	rh_superiortemporal_part6	RH	51.438	-17.538	-3.4355	Default mode	Associative cortex two (3)	0	0	0
295	rh_supramarginal_part1	RH	42.911	-34.255	40.888	Dorsal attentional	Associative cortex two (3)	0	0	0
296	rh_supramarginal_part2	RH	45.034	-24.934	18.411	Somatomotor	Associative cortex two (3)	-3.14242	-2.95317	0
297	rh_supramarginal_part3	RH	52.152	-41.396	41.956	Frontoparietal	Associative cortex two (3)	0	0	0
298	rh_supramarginal_part4	RH	55.926	-25.443	26.921	Ventral attentional	Associative cortex two (3)	0	0	0
299	rh_supramarginal_part5	RH	60.142	-41.424	23.042	Ventral attentional	Associative cortex two (3)	0	0	0
300	rh_supramarginal_part6	RH	58.938	-35.887	36.867	Ventral attentional	Associative cortex two (3)	0	0	0
301	rh_supramarginal_part7	RH	53.339	-30.726	31.863	Ventral attentional	Associative cortex two (3)	0	0	0
303	rh_temporalpole_part1	RH	32.33	9.8406	-32.328	Limbic	Associative cortex one (1)	7.07403	6.84208	4.74083
304	rh_transversetemporal_part1	RH	45.55	-20.648	7.0124	Somatomotor	Primary sensory cortex (5)	0	0	0

## Sheet: Table S2
Target_name	Matched_AHBA_homolog	Type	FDR_Zscore	PLS1_change
Beta2	ADRB2	Receptor/channel/transporter	6.37831	+
P11	S100A10	Substrate	5.40196	+
(AMPA) GluR1	GRIA1	Receptor/channel/transporter	4.84055	+
CB1	CNR1	Receptor/channel/transporter	4.63558	+
MAOB	MAOB	Receptor/channel/transporter	4.34788	+
5HT1A	HTR1A	Receptor/channel/transporter	4.08374	+
D5	DRD5	Receptor/channel/transporter	3.47473	+
MAOA	MAOA	Receptor/channel/transporter	3.27374	+
Alpha2C	ADRA2C	Receptor/channel/transporter	3.15564	+
5HT7	HTR7	Receptor/channel/transporter	2.87614	+
5HT2C	HTR2C	Receptor/channel/transporter	2.62216	+
5HT2A	HTR2A	Receptor/channel/transporter	-2.80994	-
TAAR1	TAAR1	Receptor/channel/transporter	-2.95427	-
CCNL2	CCNL2	Substrate	-2.95789	-
IKBKAP	IKBKAP	Substrate	-3.11008	-
5HT5A	HTR5A	Receptor/channel/transporter	-3.51223	-
Beta1	ADRB1	Receptor/channel/transporter	-3.5507	-
ARC	ARC	Substrate	-4.43467	-
5HT1B	HTR1B	Receptor/channel/transporter
5HT1D	HTR1D	Receptor/channel/transporter
5HT1E	HTR1E	Receptor/channel/transporter
5HT2B	HTR2B	Receptor/channel/transporter
5HT6	HTR6	Receptor/channel/transporter
D1	DRD1	Receptor/channel/transporter
D2	DRD2	Receptor/channel/transporter
D3	DRD3	Receptor/channel/transporter
D4	DRD4	Receptor/channel/transporter
Alpha1A	ADRA1A	Receptor/channel/transporter
Alpha2A	ADRA2A	Receptor/channel/transporter
Alpha1B	ADRA1B	Receptor/channel/transporter
Alpha2B	ADRA2B	Receptor/channel/transporter
SERT	SLC6A4	Receptor/channel/transporter
DAT	SLC6A3	Receptor/channel/transporter
NET	SLC6A2	Receptor/channel/transporter
Imidazoline1	NISCH	Receptor/channel/transporter
Sigma1	SIGMAR1	Receptor/channel/transporter
Sigma2	TMEM97	Receptor/channel/transporter
DOR	OPRD1	Receptor/channel/transporter
KOR	OPRK1	Receptor/channel/transporter
MOR	OPRM1	Receptor/channel/transporter
M1	CHRM1	Receptor/channel/transporter
M2	CHRM2	Receptor/channel/transporter
M3	CHRM3	Receptor/channel/transporter
M4	CHRM4	Receptor/channel/transporter
M5	CHRM5	Receptor/channel/transporter
H1	HRH1	Receptor/channel/transporter
H2	HRH2	Receptor/channel/transporter
Ca+Channel	CACNA1C	Receptor/channel/transporter
CB2	CNR2	Receptor/channel/transporter
NMDA	GRIN1	Receptor/channel/transporter
(AMPA) GluR2	GRIA2	Receptor/channel/transporter
(AMPA) GluR3	GRIA3	Receptor/channel/transporter
(AMPA) GluR4	GRIA4	Receptor/channel/transporter
BDNF	BDNF	Substrate
CFOS	FOS	Substrate
EGR1	EGR1	Substrate
KROX20	EGR2	Substrate
SGK1	SGK1	Substrate
NOR1	NR4A1	Substrate
DUSP1	DUSP1	Substrate
NPY	NPY	Substrate
IKBKB	IKBKB	Substrate
CCNL1	CCNL1	Substrate
JUNB	JUNB	Substrate
CLK1	CLK1	Substrate
PSD95	DLG4	Substrate

## Sheet: Table S3 
Reference	Aim	Tissue	Psychedelic	Post-administration measurement	Methods and measurements	Target findings
Ray TS (2010) Psychedelics and the Human Receptorome. PLOS ONE 5(2): e9019. https://doi.org/10.1371/journal.pone.0009019	In vitro receptor affinity pharmacology of twenty-five psychedelic drugs	Transfected human cell lines expressing recombinant receptors, monoamine transporters, or ion channels.	Following 10 µM 50 % inhibition "hit": 1, 10, 100, 1,000, and 10,000 nM for 2C-B: 4-Bromo-2,5-dimethoxyphenethylamine, 2C-B-FLY: 1-(8-Bromo-2,3,6,7-tetrahydrobenzo[1,2-b, 4,5-b`]difuran-4-yl)2-aminoethane, 2C-E: 4-Ethyl-2,5-dimethoxyphenethylamine, 2C-T-2: 4-Ethylthio-2,5-dimethoxyphenethylamine, ALEPH-2: (±)-4-Ethylthio-2,5-dimethoxyamphetamine, 4C-T-2: 4-Ethylthio-2,5-dimethoxyphenylbutylamine,…	Acute: directly		Ki affinity for: 5HT1A, 5HT2A, 5HT1B, 5HT1D, 5HT1E, 5HT2B, 5HT2C, 5HT5A, 5HT6, 5HT7, D1, D2, D3, D4, D5, Alpha1A, Alpha2A, Alpha1B, Alpha2B, Alpha2C, Beta1, Beta2, SERT, DAT, NET, Imidazoline1, Sigma1, Sigma2, DOR, KOR, MOR, M1, M2, M3, M4, M5, H1, H2, Ca+Channel, TAAR1, MAOA, MAOB, CB1, CB2, NMDA
Dakic V, Minardi Nascimento J, Costa Sartore R, MacIel RDM, De Araujo DB, Ribeiro S, et al.. Short term changes in the proteome of human cerebral organoids induced by 5-MeO-DMT. Sci Rep. (2017) 7:1–13. 10.1038/s41598-017-12779-5	In vitro effects of 5-MeO-DMT on cellular and molecular systems	Human cortical organoids, 45 days old. n = 4–5	Single dose, 13 μM DMT for 24 h	Acute: directly	Shotgun mass spectrometry, ICC, protein expression	Including NMDAR+, mGluR–
Jefsen OH, Elfving B, Wegener G, Müller HK. Transcriptional regulation in the rat prefrontal cortex and hippocampus after a single administration of psilocybin. J Psychopharmacol. 2021 Apr;35(4):483-493. doi: 10.1177/0269881120959614. Epub 2020 Nov 4. PMID: 33143539.	In vivo effects of acute psilocybin administration on gene expression in the rat brain	Prefrontal cortex and hippocampus of male adult rats, n = 10	Single dose, 0.5, 1.0, 2.0, 4.0, 8.0, 14.0 or 20.0 mg/kg Psi, i.p.	Acute: 90 min	PCR, Western blot, gene expression	Prefrontal cortex including: c-Fos+, Dups1+, Junb+, Iκβ-α+, Nr4a1+, P11+, Psd95+, Sgk1+, Arc –
González-Maeso J, Yuen T, Ebersole BJ, Wurmbach E, Lira A, Zhou M, Weisstaub N, Hen R, Gingrich JA, Sealfon SC. Transcriptome fingerprints distinguish hallucinogenic and nonhallucinogenic 5-hydroxytryptamine 2A receptor agonist effects in mouse somatosensory cortex. J Neurosci. 2003 Oct 1;23(26):8836-43. doi: 10.1523/JNEUROSCI.23-26-08836.2003. PMID: 14523084; PMCID: PMC6740401.	in vivoinvestigation of 5-HT2AR-dependent responses elicited by different agonists	Somatosensory cortex of adult male mice, n = 12 (LSD/wt), n = 6 (2AR KO)	Single dose, 0.24 mg/kg LSD, 2 mg/kg DOI, 0.5 mg/kg LHM, i.p.	Acute: 60 min	in situ hybridization, gene expression	Egr1+, Egr2+, Iκβ-α+, c-fos+
Nichols CD, Sanders-Bush E. A single dose of lysergic acid diethylamide influences gene expression patterns within the mammalian brain. Neuropsychopharmacology. 2002 May;26(5):634-42. doi: 10.1016/S0893-133X(01)00405-5. PMID: 11927188.	In vivo effect of acute LSD on gene expression	Prefrontal cortex, hippocampus and midbrain of male rats, n = 4	Single dose, 1.0 mg/kg LSD, i.p.	Acute: 90 min	DNA microarray, RNAse protection analysis	Prefrontal cortex including: c-Fos+, Arc+, Sgk+, Nor-1+, Krox20+, Ikβ+,
Nichols CD, Garcia EE, Sanders-Bush E. Dynamic changes in prefrontal cortex gene expression following lysergic acid diethylamide administration. Brain Res Mol Brain Res. 2003 Mar 17;111(1-2):182-8. doi: 10.1016/s0169-328x(03)00029-9. PMID: 12654518.	In vivo expression patterns of previously identified genes in the LSD mechanisms of action.	Prefrontal cortex of male rats, n = 4	Single dose, 0.20, 1.0, 0.5 mg/kg LSD, 1 or 0.5 mg/ kg MDL100907, 10 mg/kg WAY100635, 1.0 mg/kg LSD timing exp., i.p.	Acute: 45, 90, 180, 300 min	RNA protection analysis, mRNA.	Low dose: Krox20+, Ikβ+, High dose including: Arc+, c-fos+, Nor-1+, Sgk1+
Martin DA, Marona-Lewicka D, Nichols DE, Nichols CD. Chronic LSD alters gene expression profiles in the mPFC relevant to schizophrenia. Neuropharmacology. 2014;83:1-8. doi:10.1016/j.neuropharm.2014.03.013	In vivo effects of chronic LSD on cortical gene expression	Hemilateral prefrontal cortex of adult male rats, n = 10	0.16 mg/kg LSD, i.p. Every other day, 90 days	Chronic daily: 90 days	RNA sequencing, mRNA.	Including Krox20 +, Bdnf + , Npy+ , Nor-1+, Drd1+, Drd2+
Colaço CS, Alves SS, Nolli LM, Pinheiro WO, de Oliveira DGR, Santos BWL, Pic-Taylor A, Mortari MR, Caldas ED. Toxicity of ayahuasca after 28 days daily exposure and effects on monoamines and brain-derived neurotrophic factor (BDNF) in brain of Wistar rats. Metab Brain Dis. 2020 Jun;35(5):739-751. doi: 10.1007/s11011-020-00547-w. Epub 2020 Feb 27. Erratum in: Metab Brain Dis. 2021 Dec;36(8):2603-2…	In vivo effect of chronic ayahuasca on serotonin, dopamine, norepinephrine and metabolites and BDNF levels	Cortex of 5-week-old rats, M, F, n = 7–10	0.5X, 1X, 2X ayahuasca (0.26 mg/kg DMT, 2.58 mg/kg harmine, 0.171 mg/kg harmaline and 0.33 mg/kg tetrahydroharmine)., p.o (gavage) Daily, 28 days	Chronic daily: 28 days	ELISA	Fluoxetine group, female high dose group: BDNF protein +
Nardai S, László M, Szabó A, Alpár A, Hanics J, Zahola P, Merkely B, Frecska E, Nagy Z. N,N-dimethyltryptamine reduces infarct size and improves functional recovery following transient focal brain ischemia in rats. Exp Neurol. 2020 May;327:113245. doi: 10.1016/j.expneurol.2020.113245. Epub 2020 Feb 14. PMID: 32067950.	In vivo neuroprotective effects of DMT	Cortex of male mice, n = 10	Single dose 1 mg/kg DMT, i.v. with maintenance of 2 mg/kg/h over 24 h	25 h after MCAO (protein levels)	ELISA, protein levels	Bdnf+, serum BDNF protein+
Gene selection: a subset of candidate genes were selected from the AHBA transcriptomic atlas reflecting a) complete serotonergic psychedelic binding profiles (Ray TS 2010, Ballentine et al. 2022) and b) an exploratory subset of molecular signalling cascades previously implicated in 5-HT2A-mediated neuroplasticity. In the case of b) a non-exhaustive initial selection of genes representing (see Tab…
